# Supplementary material for: A New Shrimp Genus (Crustacea: Decapoda) from the Deep Atlantic and an Unusual Cleaning Mechanism of Pelagic Decapods
Source: MDPI journal article supplement (doi:10.3390/d13110536), 2021-10-26
Supplement: s1 [file s1]

**File S7. Partitioning scheme and best models selected by PartitionFinder2.**

| Partition                        | Best Model |
|----------------------------------|------------|
| 16S                              | GTR+I+G    |
| 18S, 1 <sup>st</sup> codon of H3 | TRN+G      |
| 2 <sup>nd</sup> codon of H3      | JC+I       |
| 3 <sup>rd</sup> codon of H3      | TVMEF+I    |
| 1 <sup>st</sup> codon of COI     | SYM+G      |
| 2 <sup>nd</sup> codon of COI     | TVM+I      |
| 3 <sup>rd</sup> codon of COI     | K81UF+G    |
