# Supplementary material for: A New Shrimp Genus (Crustacea: Decapoda) from the Deep Atlantic and an Unusual Cleaning Mechanism of Pelagic Decapods
Source: MDPI journal article supplement (doi:10.3390/d13110536), 2021-10-26
Supplement: s1 [file s1]

## File S2. Character state

0 - 51

|                            | 0 | 5 | 10 | 15 | 20 | 25 | 30 | 35 | 40 | 45 | 50 |
|----------------------------|---|---|----|----|----|----|----|----|----|----|----|
|                            |   |   |    |    |    |    |    |    |    |    |    |
| Pasiphaea sivado           | 0 | 0 | 0  | 0  | 0  | 0  | 0  | 0  | 0  | 0  | 0  |
| Alvinocaris longirostris   | 0 | 0 | 0  | 0  | 0  | 0  | 0  | 0  | 0  | 0  | 0  |
| Janicella spinicauda       | 0 | 0 | 0  | 0  | 0  | 0  | 0  | 0  | 0  | 0  | 0  |
| Oplophorus gracilirostris  | 0 | 0 | 0  | 0  | 0  | 0  | 0  | 0  | 0  | 0  | 0  |
| Systellaspis pellucida     | 0 | 0 | 0  | 0  | 0  | 0  | 0  | 0  | 0  | 0  | 0  |
| Hymenodora acanthitelsonis | 0 | 1 | 0  | 1  | 0  | 0  | 0  | 0  | 0  | 0  | 0  |
| Sclerodora crosnieri       | 0 | 1 | 0  | 0  | 0  | 0  | 0  | 0  | 0  | 0  | 0  |
| Hymenodora glacialis       | 0 | 1 | 0  | 0  | 0  | 0  | 0  | 0  | 0  | 0  | 0  |
| Hymenodora gracilis        | 0 | 1 | 0  | 0  | 0  | 0  | 0  | 0  | 0  | 0  | 0  |
| Hymenodora frontalis       | 0 | 1 | 0  | 0  | 0  | 0  | 0  | 0  | 0  | 0  | 0  |
| Acanthephyra quadrispinosa | 0 | 0 | 0  | 0  | 0  | 0  | 0  | 0  | 0  | 0  | 0  |
| Ephyrina ombango           | 1 | 0 | 0  | 0  | 0  | 0  | 0  | 0  | 0  | 0  | 0  |
| Heterogenys microphthalma  | 0 | 0 | 0  | 0  | 0  | 0  | 0  | 0  | 0  | 0  | 0  |
| Kemphyra corallina         | 0 | 0 | 0  | 0  | 0  | 0  | 0  | 0  | 0  | 0  | 0  |
| Meningodora longisulca     | 0 | 0 | 0  | 0  | 0  | 0  | 0  | 0  | 0  | 0  | 0  |
| Notostomus elegans         | 0 | 0 | 0  | 0  | 0  | 0  | 0  | 0  | 0  | 0  | 0  |

Characters 52 - 80

|                            | 52 | 57 | 62 | 67 | 72 | 77 |
|----------------------------|----|----|----|----|----|----|
|                            |    |    |    |    |    |    |
| Pasiphaea sivado           | 0  | 0  | 0  | 0  | 0  | 0  |
| Bresilia saldanhai         | 0  | 0  | 0  | 0  | 0  | 0  |
| Janicella spinicauda       | 0  | 0  | 0  | 0  | 0  | 0  |
| Oplophorus gracilirostris  | 0  | 0  | 0  | 0  | 0  | 0  |
| Systellaspis pellucida     | 0  | 0  | 0  | 0  | 0  | 0  |
| Hymenodora acanthitelsonis | 0  | 0  | 0  | 0  | 0  | 0  |
| Sclerodora crosnieri       | 0  | 0  | 0  | 0  | 0  | 0  |
| Hymenodora glacialis       | 0  | 0  | 0  | 0  | 0  | 0  |
| Hymenodora gracilis        | 0  | 0  | 0  | 0  | 0  | 0  |
| Hymenodora frontalis       | 0  | 0  | 0  | 0  | 0  | 0  |
| Acanthephyra quadrispinosa | 1  | 1  | 0  | 0  | 0  | 0  |
| Ephyrina ombango           | 1  | 1  | 0  | 0  | 0  | 0  |
| Heterogenys microphthalma  | 1  | 1  | 0  | 0  | 0  | 0  |
| Kemphyra corallina         | 1  | 1  | 0  | 0  | 0  | 0  |
| Meningodora longisulca     | 1  | 1  | 0  | 0  | 0  | 0  |
| Notostomus elegans         | 1  | 1  | 0  | 0  | 0  | 0  |
