# Supplementary material for: A New Shrimp Genus (Crustacea: Decapoda) from the Deep Atlantic and an Unusual Cleaning Mechanism of Pelagic Decapods
Source: MDPI journal article supplement (doi:10.3390/d13110536), 2021-10-26

## File S5. Synapomorphies.

### Analysis 1.

Synapomorphies common to 1 trees

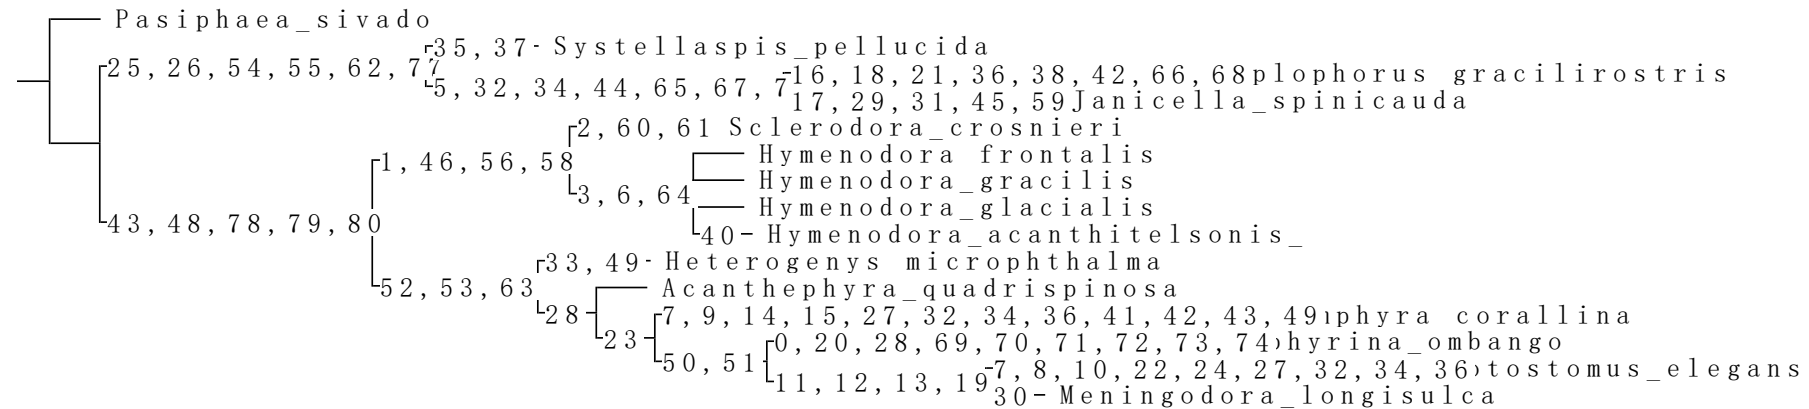

### Analysis 2.

Synapomorphies common to 1 trees

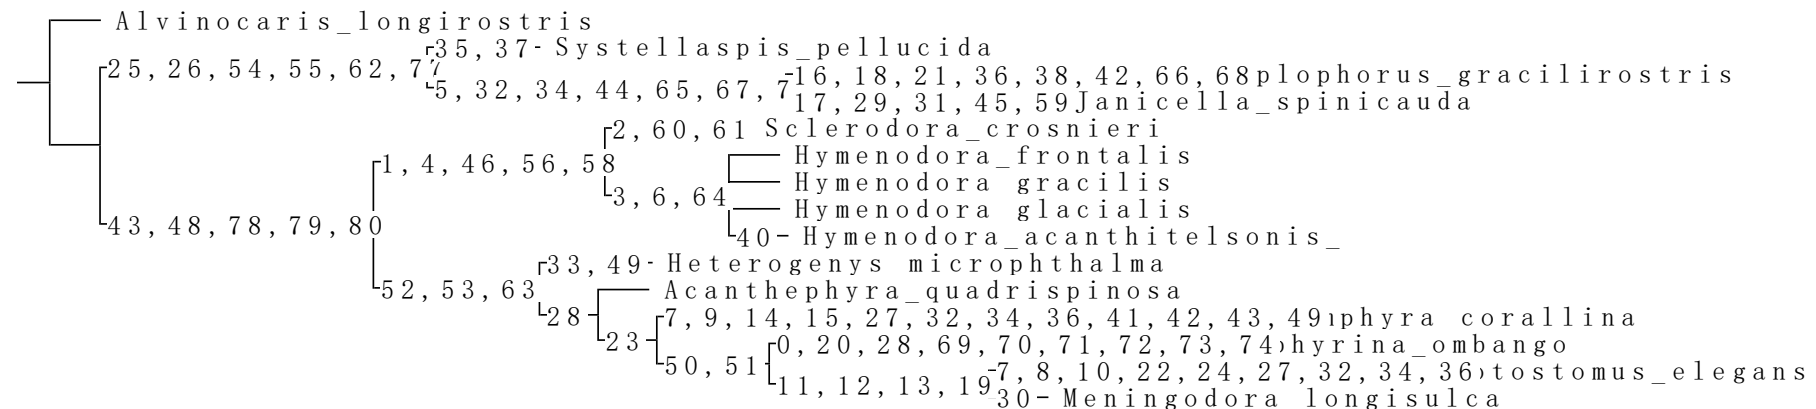

Supplement: s1 [file s1]
