# Supplementary material for: A New Shrimp Genus (Crustacea: Decapoda) from the Deep Atlantic and an Unusual Cleaning Mechanism of Pelagic Decapods
Source: MDPI journal article supplement (doi:10.3390/d13110536), 2021-10-26

## File S4. Retrieved morphological trees. Bootstrap support.

### Analysis 1.

GC values, 10000 replicates, cut=1 (tree 0) - Standard Bootstrap

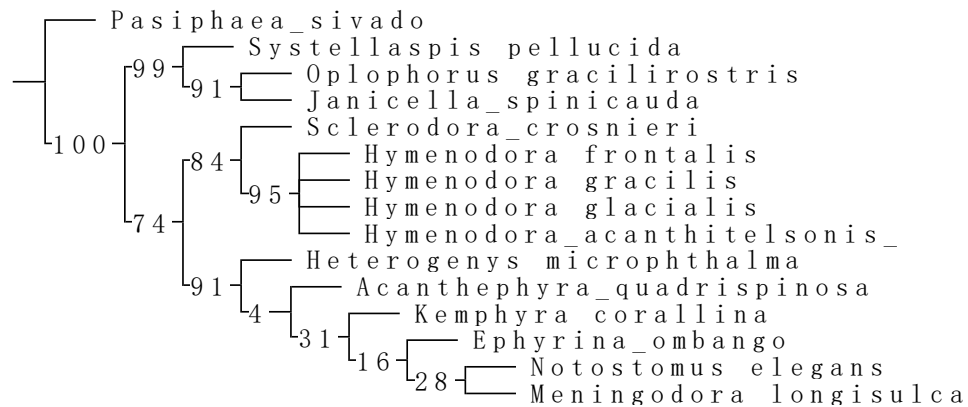

### Analysis 2.

GC values, 10000 replicates, cut=1 (tree 0) - Standard Bootstrap

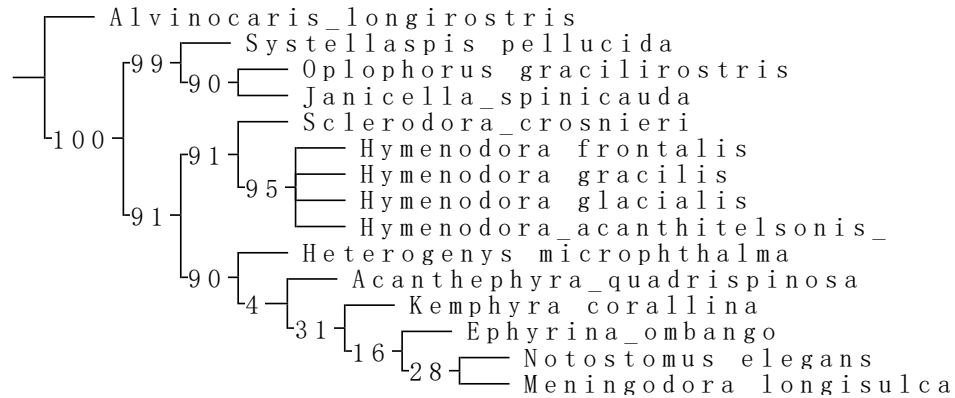

Supplement: s1 [file s1]
