# Supplementary material for: A New Shrimp Genus (Crustacea: Decapoda) from the Deep Atlantic and an Unusual Cleaning Mechanism of Pelagic Decapods
Source: MDPI journal article supplement (doi:10.3390/d13110536), 2021-10-26

**Analysis 1.**

A phylogenetic tree illustrating the evolutionary relationships among several species. The tree is rooted on the left and branches out to the right. Bootstrap values are provided for many of the internal nodes, indicating the confidence in the branching order. The species names are listed to the right of the branches.

- Pasiphaea\_sivado*
- 6
  - Systellaspis\_pellucida*
  - 5
    - Oplophorus\_gracilirostris*
    - Janicella\_spinicauda*
- 8?
  - Sclerodora\_crosnieri*
  - 3
    - Hymenodora frontalis
    - 3
      - Hymenodora gracilis
      - Hymenodora glacialis
      - Hymenodora\_acanthitelsonis\_
  - 3
    - Heterogenys\_microphthalmia*
    - 3
      - Acanthephyra\_quadrispinosa*
      - 1
        - Kemphyra\_corallina*
        - 1
          - Ephyrina\_ombango*
          - 1
            - Notostomus\_elegans*
            - Meningodora\_longisulca*

## Bremer supports (from 350 trees, cut 0)

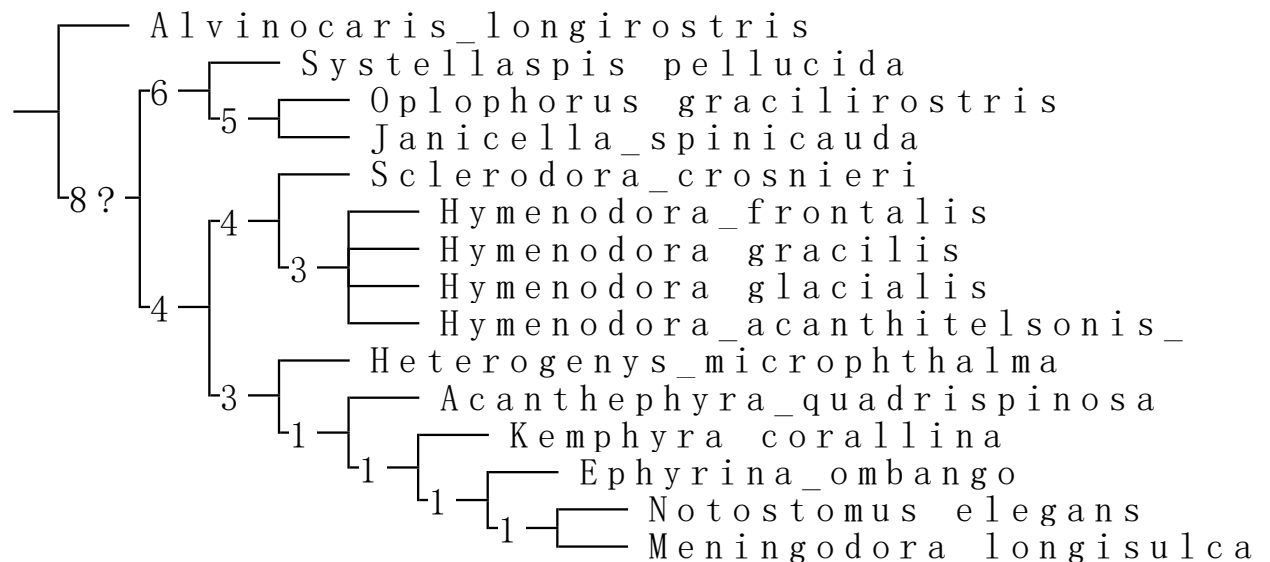

Supplement: s1 [file s1]
