# Supplementary material for: A New Shrimp Genus (Crustacea: Decapoda) from the Deep Atlantic and an Unusual Cleaning Mechanism of Pelagic Decapods
Source: MDPI journal article supplement (doi:10.3390/d13110536), 2021-10-26
Supplement: s1 [file s1]

**File S9. Estimates of evolutionary divergence between species.**

The percent of base substitutions between sequences are shown. Analyses were run using the Kimura 2-parameter model (Kimura, 1980), a total of 394 positions in the analyzed dataset. Evolutionary analyses were conducted in MEGA X (Kumar et al., 2018).

|                                   | <i>S. crosnieri</i> | <i>H. frontalis</i> | <i>H. glacialis</i> | <i>H. gracilis</i> | <i>A. quadrispinosa</i> | <i>E. ombango</i> | <i>H. microphthalma</i> | <i>K. corallina</i> | <i>M. longisulca</i> | <i>N. elegans</i> | <i>J. spinicauda</i> | <i>O. gracilirostris</i> | <i>S. pellucida</i> | <i>A. longirostris</i> |
|-----------------------------------|---------------------|---------------------|---------------------|--------------------|-------------------------|-------------------|-------------------------|---------------------|----------------------|-------------------|----------------------|--------------------------|---------------------|------------------------|
| <i>Sclerodora crosnieri</i>       |                     |                     |                     |                    |                         |                   |                         |                     |                      |                   |                      |                          |                     |                        |
| <i>Hymenodora frontalis</i>       | 31.9                |                     |                     |                    |                         |                   |                         |                     |                      |                   |                      |                          |                     |                        |
| <i>Hymenodora glacialis</i>       | 32.9                | 27.0                |                     |                    |                         |                   |                         |                     |                      |                   |                      |                          |                     |                        |
| <i>Hymenodora gracilis</i>        | 32.5                | 23.9                | 9.4                 |                    |                         |                   |                         |                     |                      |                   |                      |                          |                     |                        |
| <i>Acanthephyra quadrispinosa</i> | 44.4                | 47.1                | 47.0                | 41.9               |                         |                   |                         |                     |                      |                   |                      |                          |                     |                        |
| <i>Ephyrina ombango</i>           | 51.5                | 52.4                | 55.9                | 53.0               | 23.9                    |                   |                         |                     |                      |                   |                      |                          |                     |                        |
| <i>Heterogenys microphthalma</i>  | 46.1                | 48.5                | 50.0                | 49.5               | 20.8                    | 21.9              |                         |                     |                      |                   |                      |                          |                     |                        |
| <i>Kemphyra corallina</i>         | 50.7                | 49.8                | 54.7                | 54.0               | 21.4                    | 21.5              | 17.9                    |                     |                      |                   |                      |                          |                     |                        |
| <i>Meningodora longisulca</i>     | 43.4                | 52.6                | 49.5                | 45.4               | 24.3                    | 28.4              | 26.1                    | 27.6                |                      |                   |                      |                          |                     |                        |
| <i>Notostomus elegans</i>         | 55.4                | 51.4                | 53.5                | 57.1               | 25.4                    | 24.0              | 21.5                    | 20.4                | 25.8                 |                   |                      |                          |                     |                        |
| <i>Janicella spinicauda</i>       | 50.9                | 53.0                | 54.1                | 50.6               | 26.7                    | 24.5              | 26.3                    | 25.6                | 28.3                 | 26.0              |                      |                          |                     |                        |
| <i>Oplophorus gracilirostris</i>  | 44.8                | 49.2                | 48.4                | 45.0               | 24.5                    | 21.9              | 26.2                    | 27.9                | 23.6                 | 27.0              | 24.4                 |                          |                     |                        |
| <i>Systellaspis pellucida</i>     | 49.6                | 51.3                | 51.2                | 49.7               | 26.6                    | 26.4              | 23.5                    | 26.1                | 27.8                 | 25.9              | 28.9                 | 23.3                     |                     |                        |
| <i>Alvinocaris longirostris</i>   | 50.1                | 52.0                | 51.3                | 50.0               | 25.2                    | 27.0              | 24.9                    | 21.4                | 30.9                 | 24.9              | 30.3                 | 27.5                     | 29.7                |                        |
| <i>Pasiphaea sivado</i>           | 40.8                | 39.3                | 47.8                | 46.6               | 27.0                    | 29.7              | 30.6                    | 31.8                | 32.2                 | 36.0              | 29.4                 | 32.5                     | 34.7                | 34.0                   |
