# Supplementary figures and images for: A New Shrimp Genus (Crustacea: Decapoda) from the Deep Atlantic and an Unusual Cleaning Mechanism of Pelagic Decapods
Source: MDPI journal article supplement (doi:10.3390/d13110536), 2021-10-26

File S8. Molecular BI (above) and ML (below) trees.

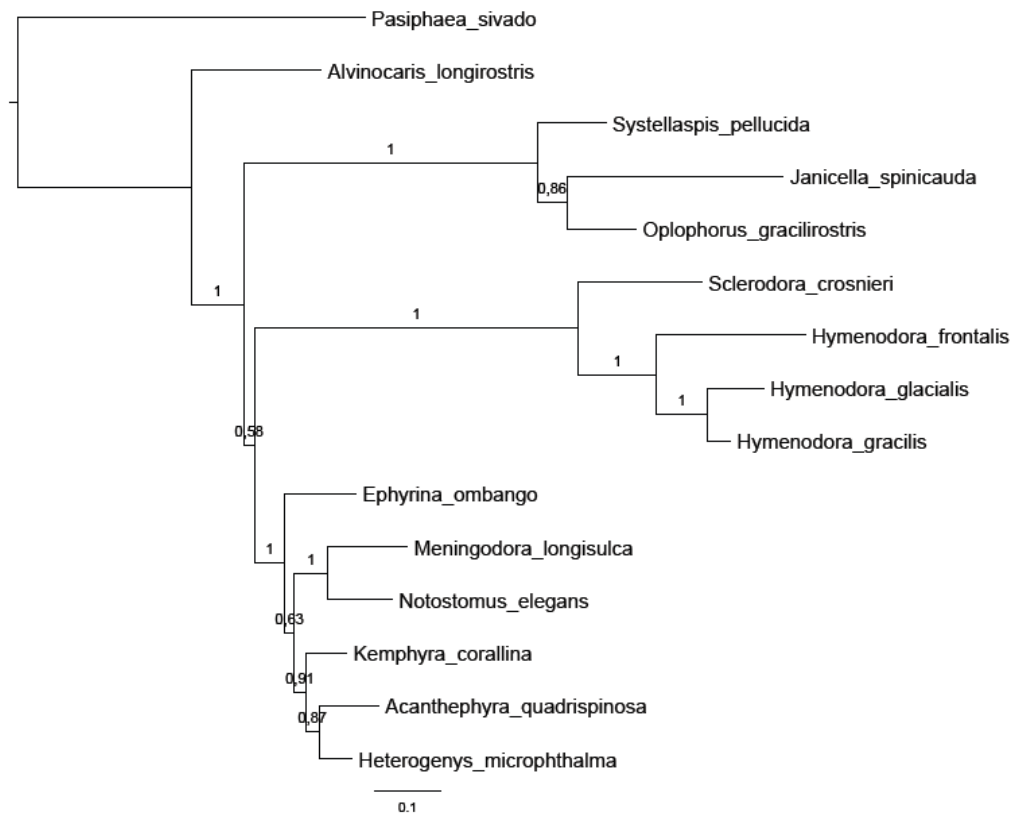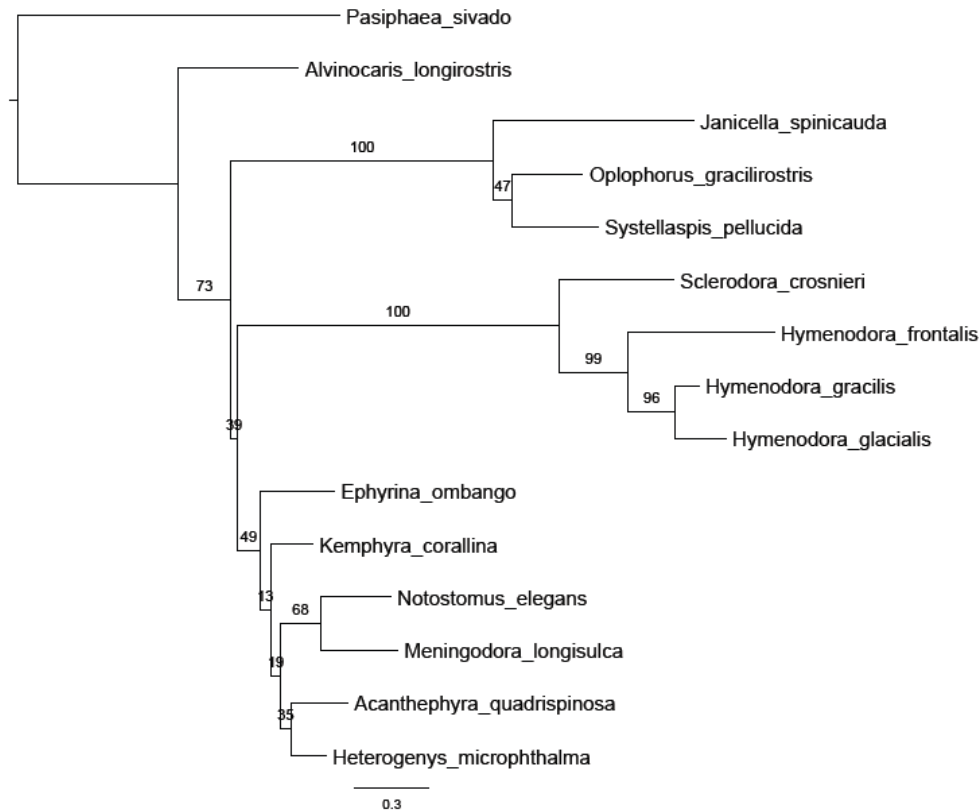

Supplement: s1 [file s1]

**File S6 . Maximum likelihood (RAxML) phylograms for each individual gene dataset: (a) COI, (b) 16S, (c) 18S, and (d) H3.**

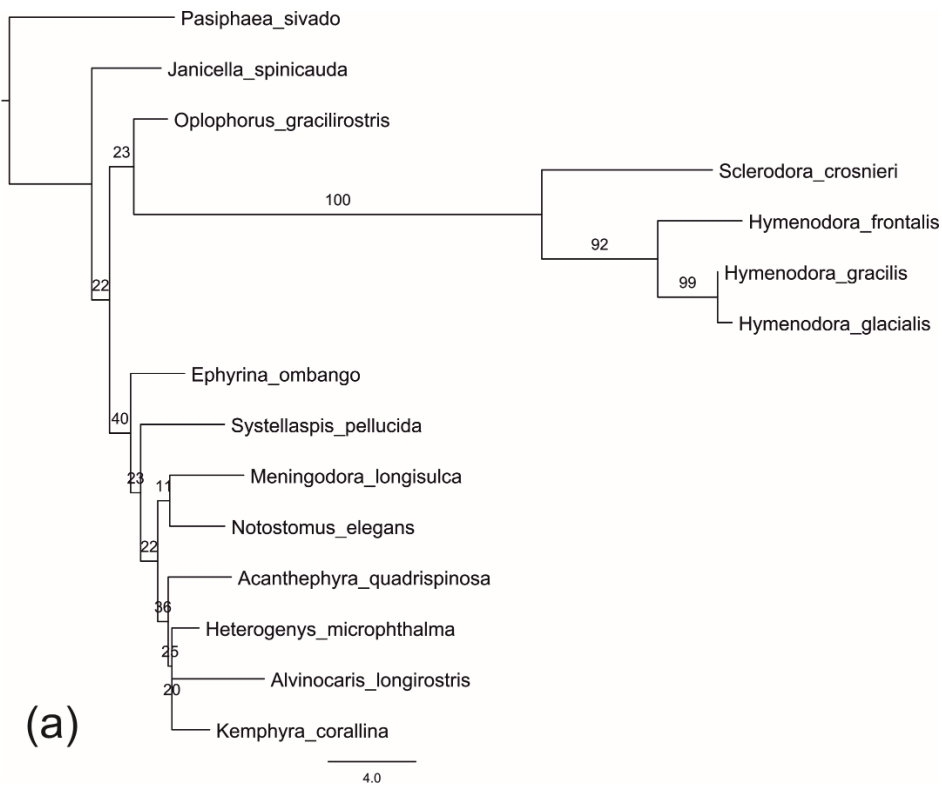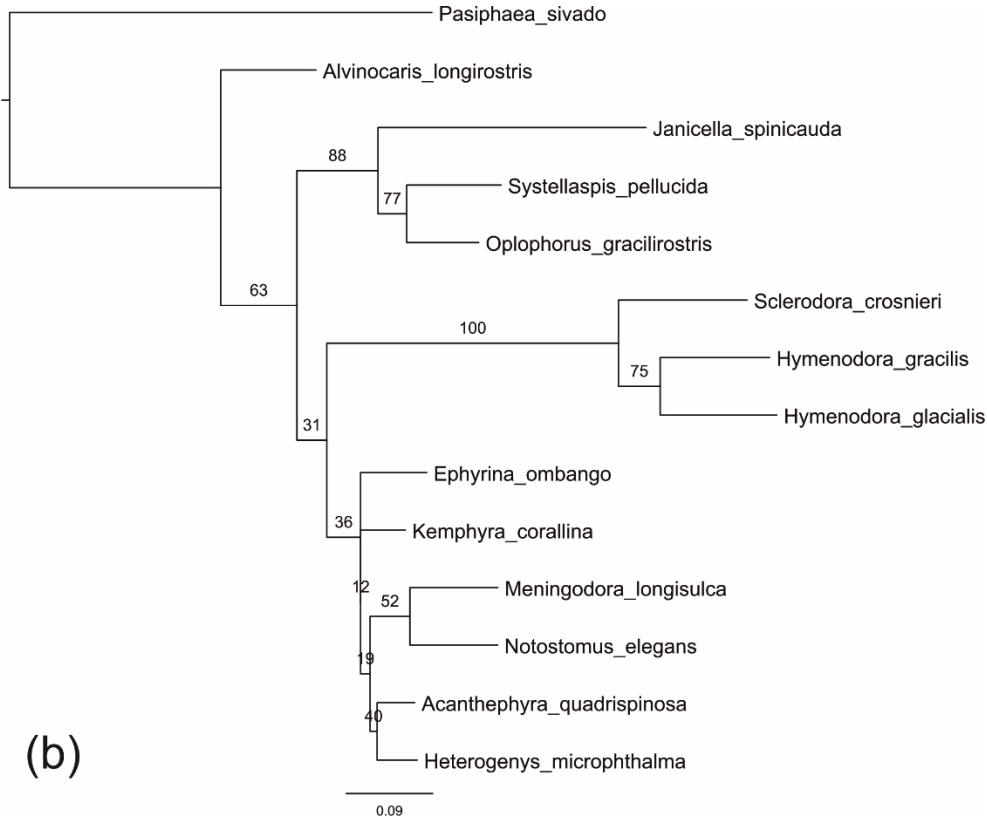

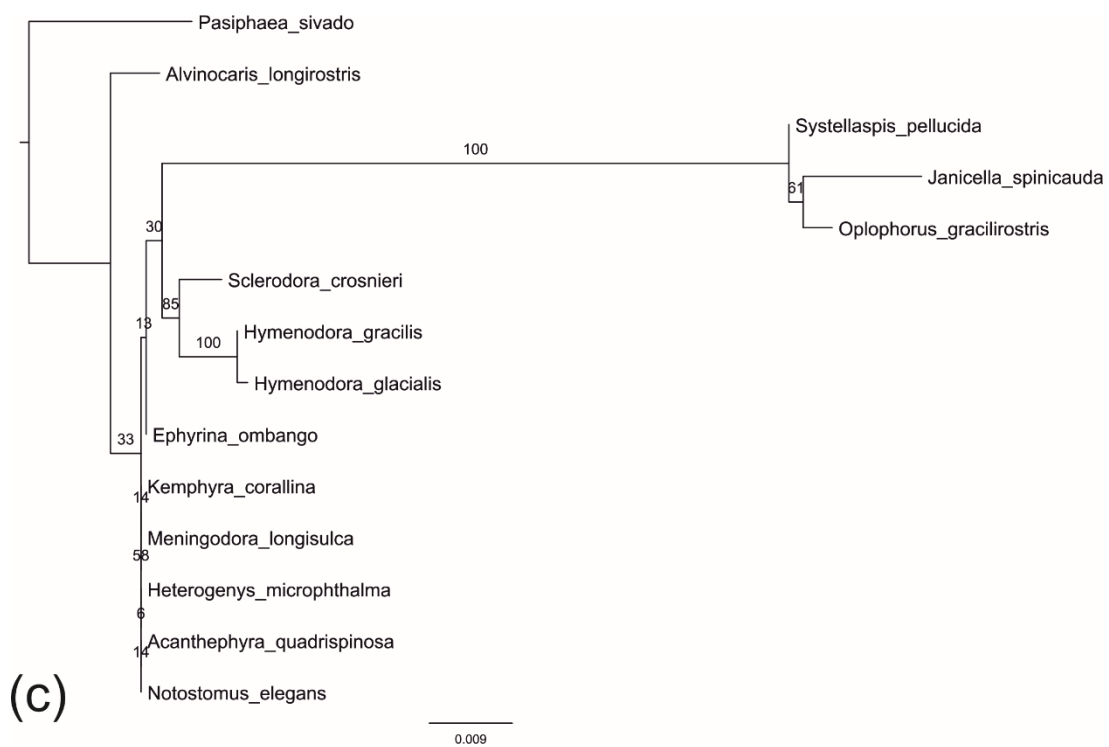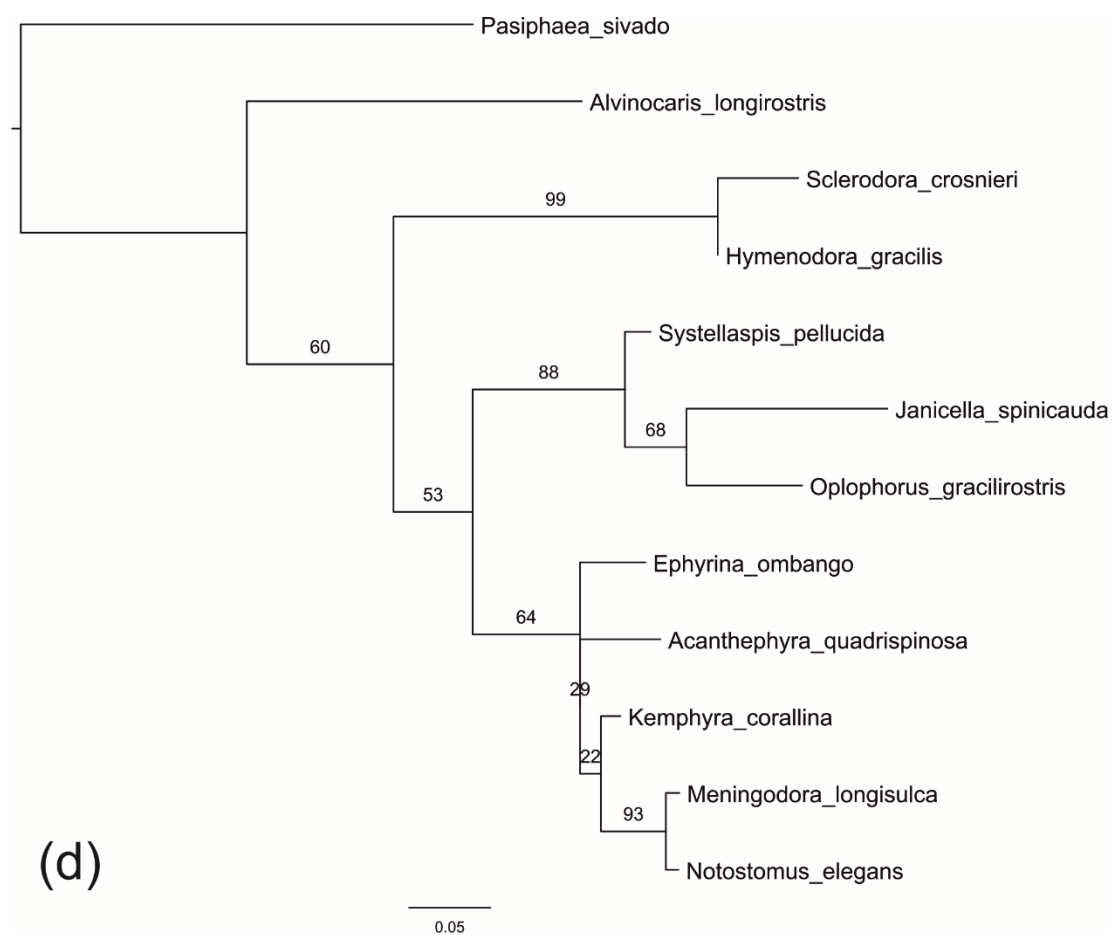

Supplement: s1 [file s1]
